# Supplementary material for: VEGF Modulates Neurogenesis and Microvascular Remodeling in Epileptogenesis After Status Epilepticus in Immature Rats
Source: Frontiers journal article supplement (doi:10.3389/fneur.2021.808568), 2021-12-24
Supplement: Presentation_1.pdf [file Presentation_1.pdf]

*Supplementary Material*

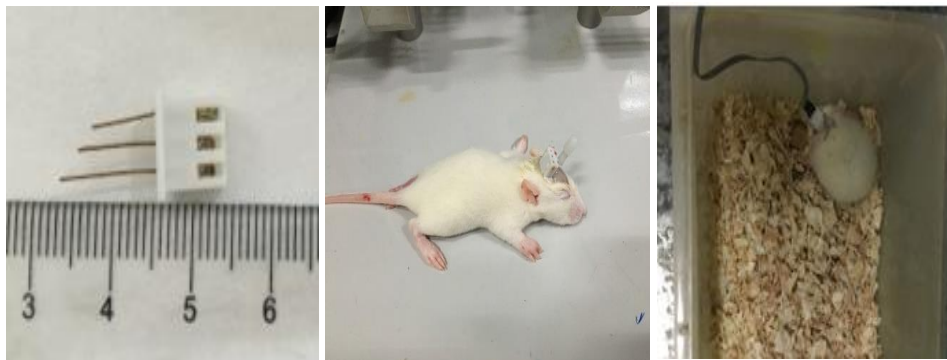

**Supplementary Figure 1.** Simple electrode installation and EEG recording

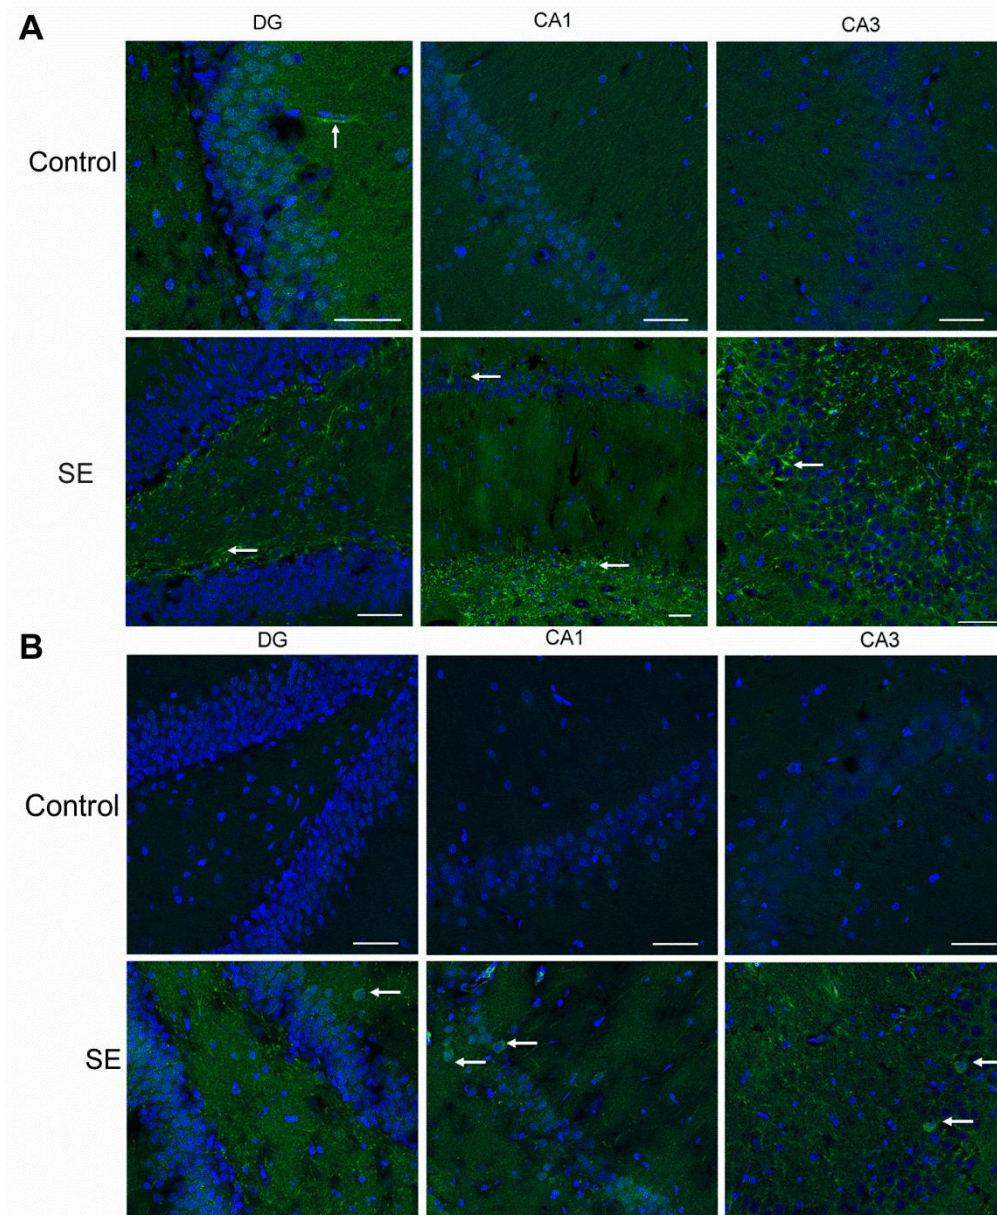

**Supplementary Figure 2.** VEGF and VEGFR2 expression in the hippocampi of immature rats after SE (**A**) VEGF expression in the hippocampi of immature rats after SE (**B**) VEGFR2 expression in the hippocampi of immature rats after SE (VEGF: green; VEGFR2: green; DAPI: blue; 400 $\times$ ; scale bar: 50  $\mu$ m).
